# Supplementary material for: Structural and Biochemical Analysis of a Single Amino-Acid Mutant of WzzBSF That Alters Lipopolysaccharide O-Antigen Chain Length in Shigella flexneri
Source: PubMed Central journal article supplement (PMC4574919; doi:10.1371/journal.pone.0138266), 2015-09-17
Supplement: pone.0138266.s001.pdf [file pone.0138266.s001.pdf]

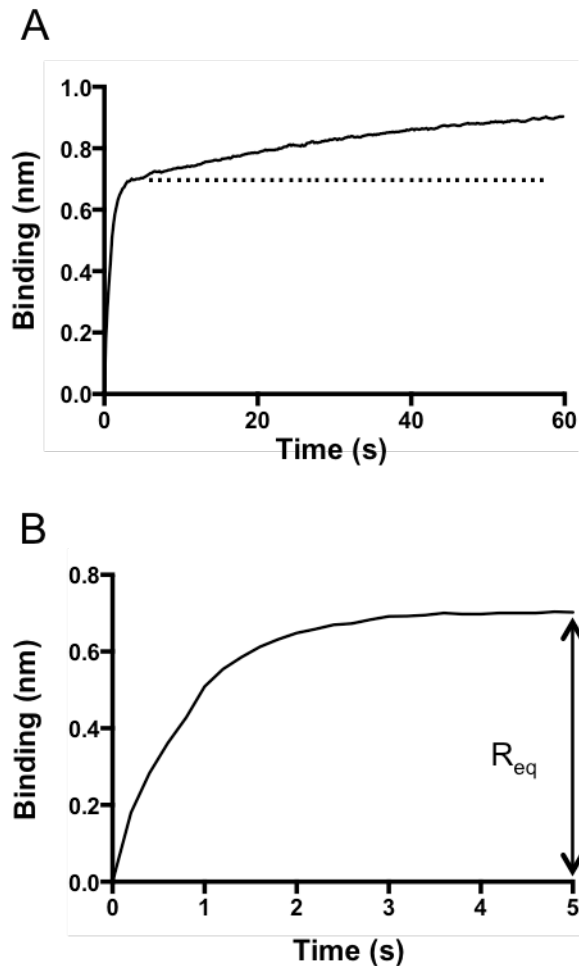

**S1 Fig. VS-COPS binding to  $WzzB_{SF}$ .** (A) The association (60 s) of VS-COPS to  $WzzB_{SF}$  indicates a bi-phasic binding mode. The first binding phase reaches saturation at approximately 5 s. The second binding phase shows slower association kinetics and does not reach equilibrium within the 60 s of the association. The dashed line shows the saturation plateau for first binding event. (B) Calculation of  $R_{eq}$  for the first binding phase (5 s) of VS-COPS to His-tagged  $WzzB_{SF}$ .
