# Supplementary material for: Structural and Biochemical Analysis of a Single Amino-Acid Mutant of WzzBSF That Alters Lipopolysaccharide O-Antigen Chain Length in Shigella flexneri
Source: PubMed Central journal article supplement (PMC4574919; doi:10.1371/journal.pone.0138266), 2015-09-17
Supplement: pone.0138266.s002.pdf [file pone.0138266.s002.pdf]

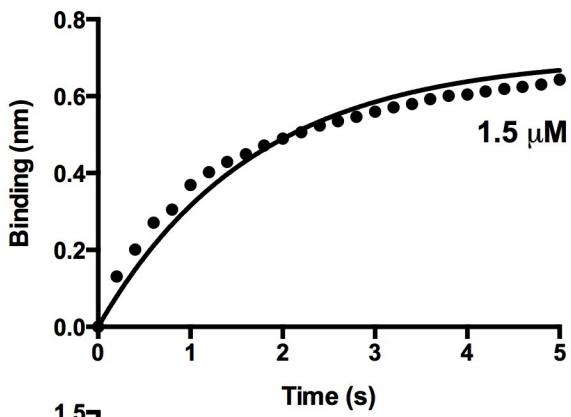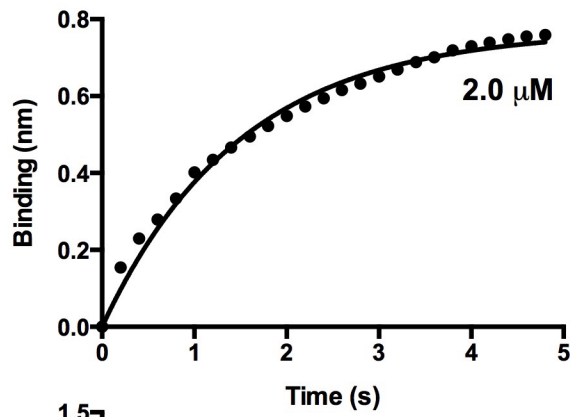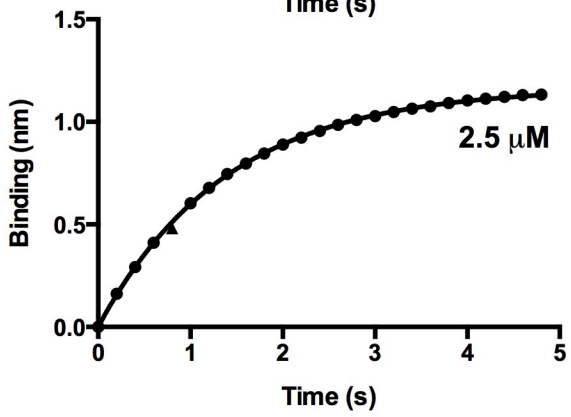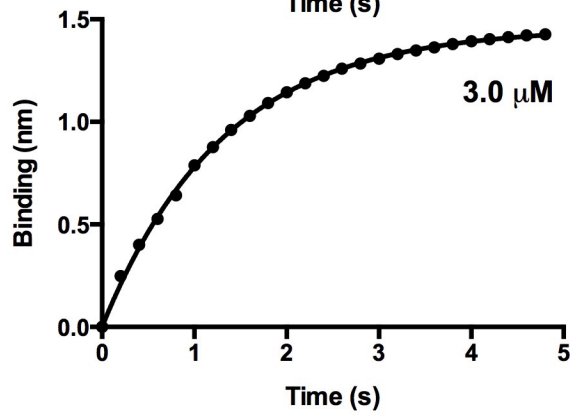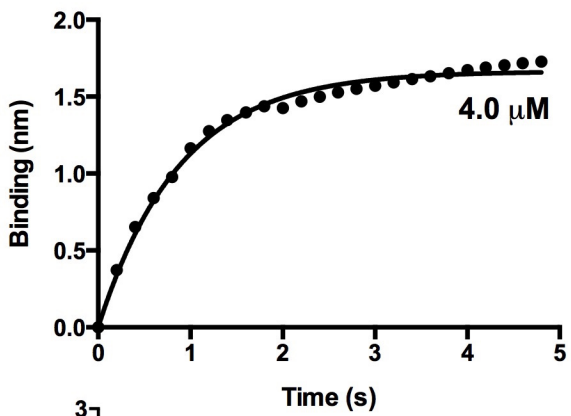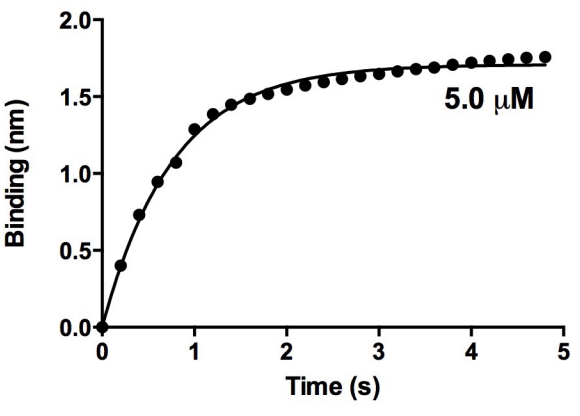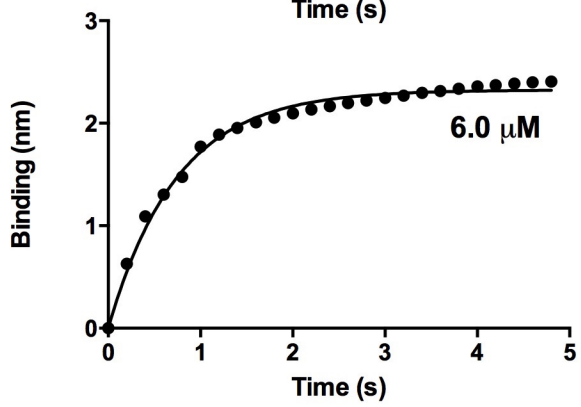

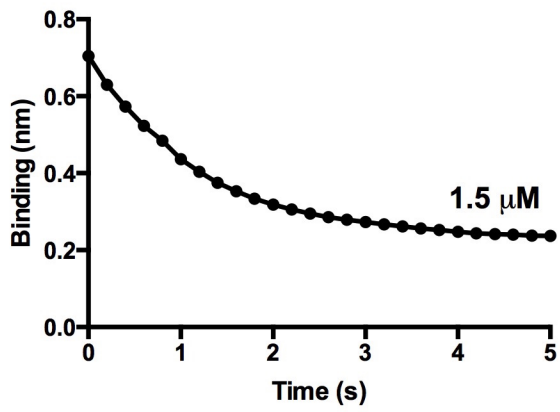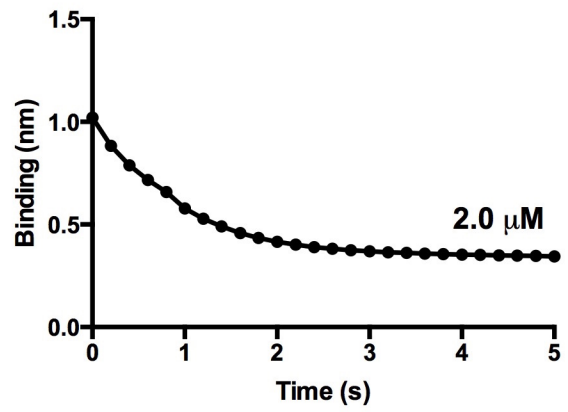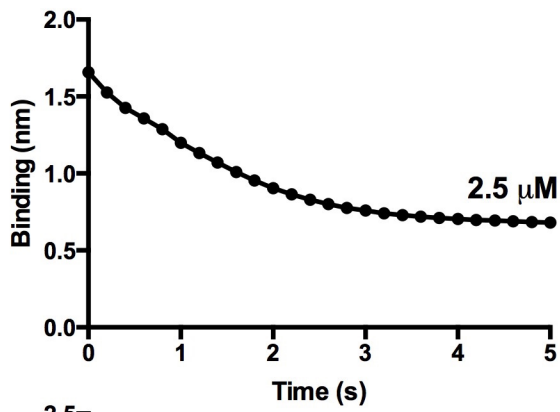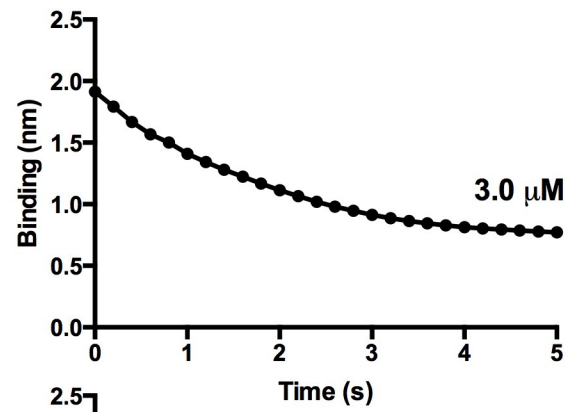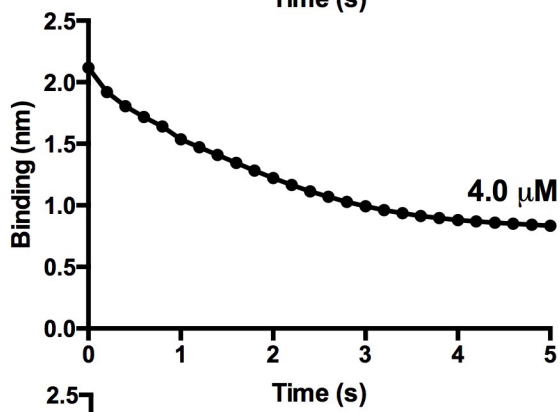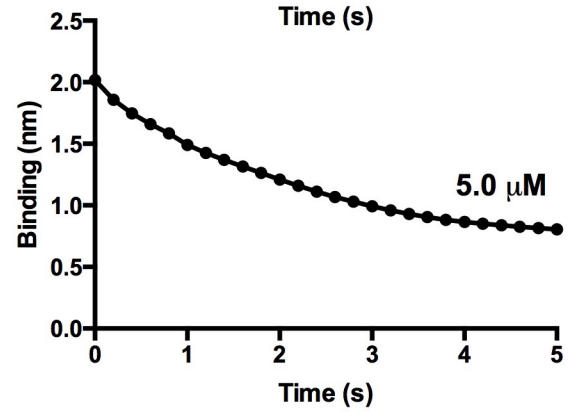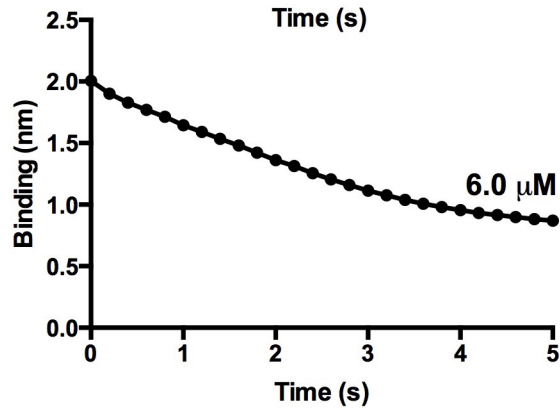

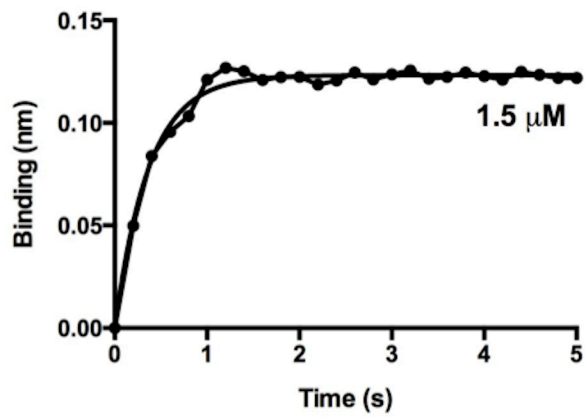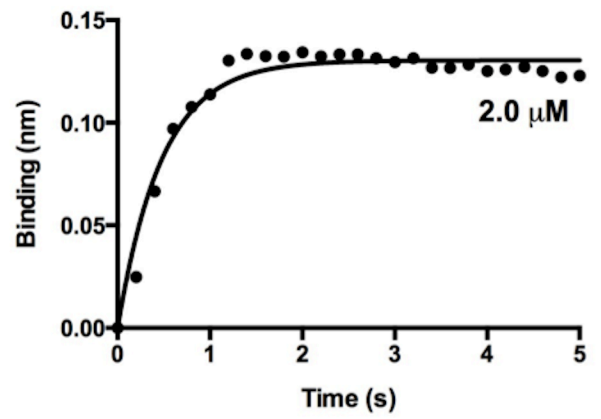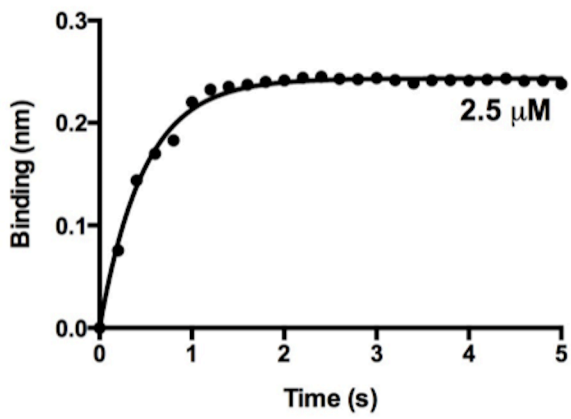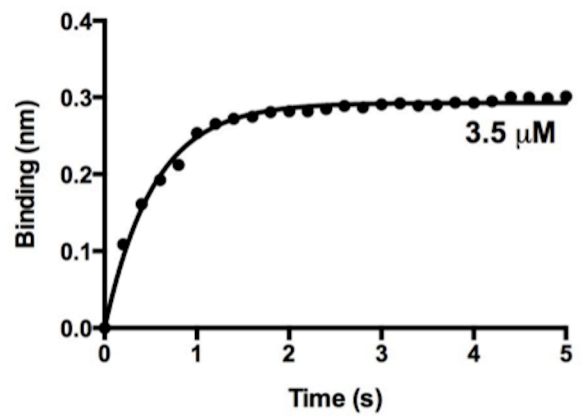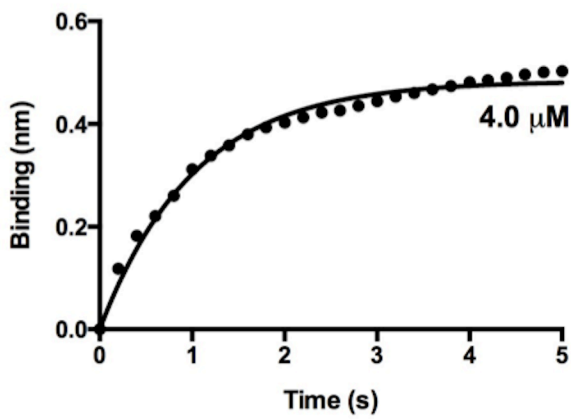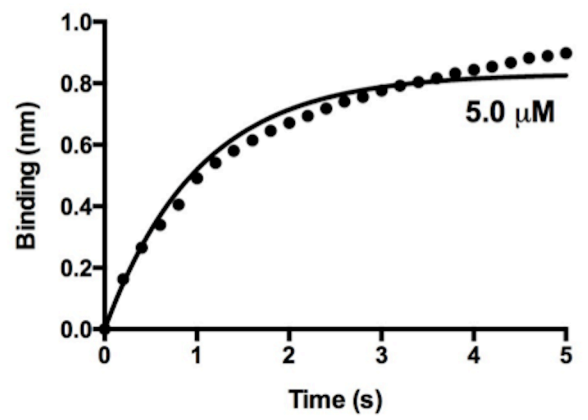

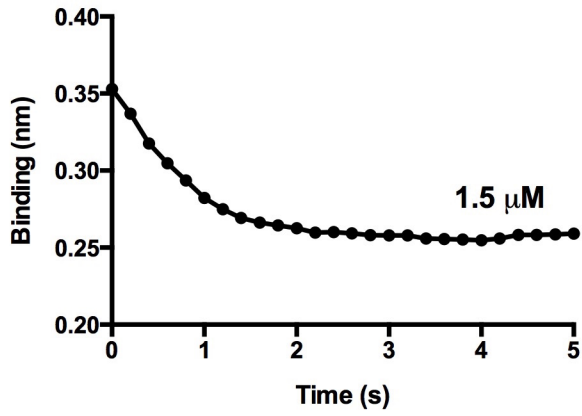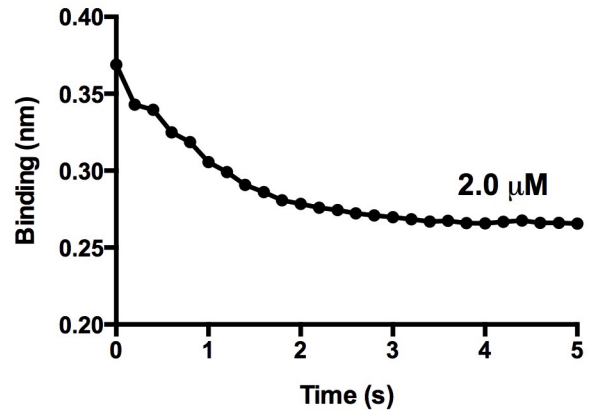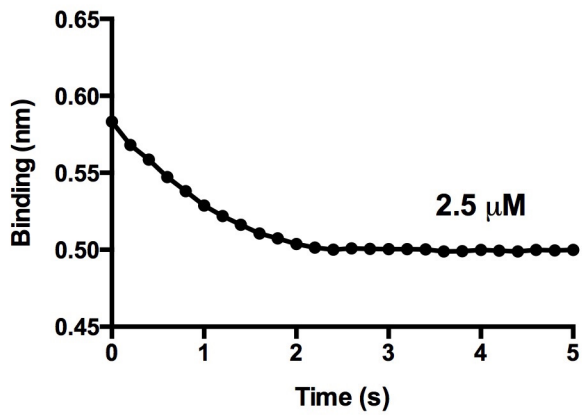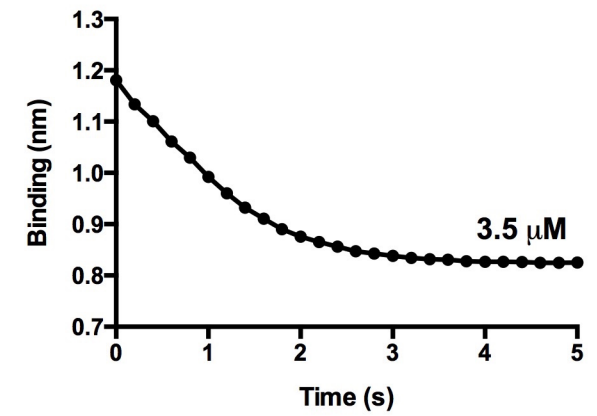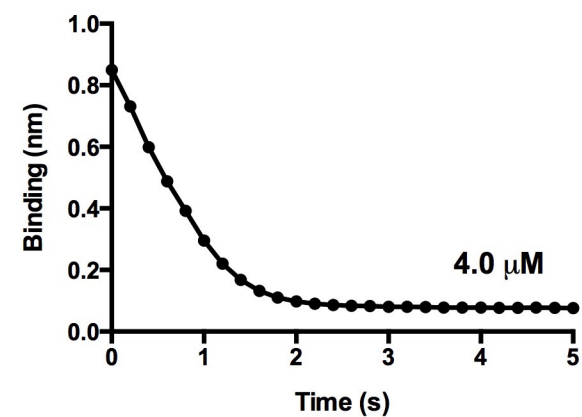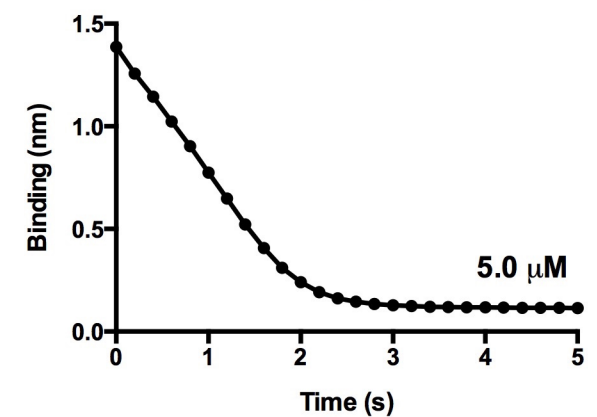

**S2 Fig.. Representative raw data for the binding between VS-COPS and WzzB<sub>SF</sub> proteins.** (A) The association (5 s) of His-tagged WzzB<sub>SF</sub> to different concentrations of VS-COPS at the first binding phase, and (B) the corresponding disassociation (5 s). (C-D) The association (5 s) and the dissociation (5 s) steps of His-tagged WzzB<sub>SF</sub><sup>A107P</sup> at different concentrations of VS-COPS.
